# Supplementary material for: Therapeutic Effect of Shikimic Acid on Heat Stress-Induced Myocardial Damage: Assessment via Network Pharmacology, Molecular Docking, Molecular Dynamics Simulation, and In Vitro Experiments
Source: Preprints.org preprint supplement (doi:10.20944/preprints202408.1263.v1), 2024-08-19
Supplement: Supplementary file 1 [file supplementary]

| Keyword | Database | Number of targets | Actual selection | Total |
| --- | --- | --- | --- | --- |
| Heat stress | Disgenet | 3 | 3 | 2850 |
| CTD | 7072 | Top 2000 |
| GeneCards | 10081 | Top 2000 |
| OMIM | 71 | 71 |
| Cardiac injury | Disgenet | \ | \ | 2011 |
| CTD | \ | \ |
| GeneCards | 9140 | Top 2000 |
| OMIM | 101 | 101 |
| Heart injury | Disgenet | 12 | 12 | 3373 |
| CTD | 30393 | Top 2000 |
| GeneCards | 10304 | Top 2000 |
| OMIM | \ | \ |
| Myocardial damage | Disgenet | \ | \ | 2000 |
| CTD | \ | \ |
| GeneCards | 5638 | Top 2000 |
| OMIM | 57 | 57 |

Table Supplementary 1. The number of targets collected by each database
